# Supplementary material for: Effects of low doping on the improvement of cathode materials Na3+xV2−xMx(PO4)3 (M = Co2+, Cu2+; x = 0.01–0.05) for SIBs
Source: Royal Society of Chemistry journal article supplement (doi:10.1039/d1ta05000a), 2021-01-01
Supplement: d1ta05000a1.pdf [file d1ta05000a1.pdf]

## Electronic Supplementary Information (ESI)

### Effects of low doping on the improvement of cathode materials

#### $\text{Na}_{3+x}\text{V}_{2-x}\text{M}_x(\text{PO}_4)_3$ ( $\text{M} = \text{Co}^{2+}, \text{Cu}^{2+}$ ; $x = 0.01-0.05$ ) for SIBs

Ruoyu Chen<sup>a</sup>, Denys S. Butenko,<sup>a</sup> Shilin Li<sup>a</sup>, Dongdong Li<sup>a</sup>, Xinyu Zhang,<sup>b</sup> Junming Cao,<sup>a</sup> Ivan V. Ogorodnyk,<sup>c</sup> Nickolai I. Klyui,<sup>d,e</sup> Wei Han<sup>a\*</sup> and Igor V. Zatovsky<sup>d\*</sup>

<sup>a</sup> College of Physics, the State Key Laboratory of Inorganic Synthesis and Preparative Chemistry, International Center of Future Science, Jilin University, Changchun 130012, P.R. China.

<sup>b</sup> Innovation Center of Computational Physics Methods and Software & State Key Laboratory of Superhard Materials, College of Physics, Jilin University, Changchun 130012, P.R. China.

<sup>c</sup> ShimUkraine LLC, 18, Chigorina Str., office 429, 01042 Kyiv, Ukraine.

<sup>d</sup> College of Physics, Jilin University, 2699 Qianjin st., 130012 Changchun, R.P. China.

<sup>e</sup> V. Lashkaryov Institute of Semiconductor Physics, NAS of Ukraine, 41 pr. Nauki, 03028 Kyiv, Ukraine.

E-mail: [whan@jlu.edu.cn](mailto:whan@jlu.edu.cn) (Wei Han\*) [zvigo@yandex.ru](mailto:zvigo@yandex.ru) (Igor V. Zatovsky\*)

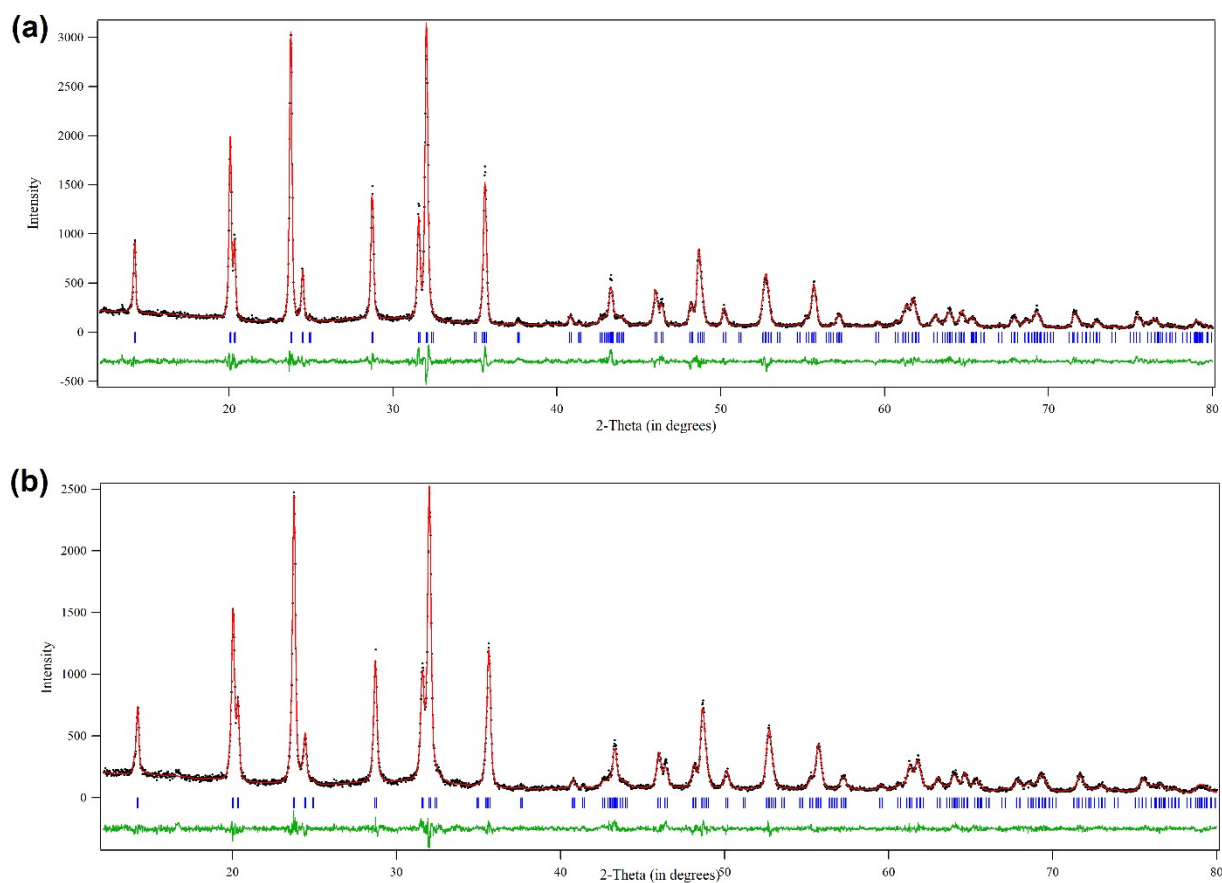

**Figure S1.** XRD Rietveld refinement for (a)  $\text{Na}_{3.01}\text{V}_{1.99}\text{Co}_{0.01}(\text{PO}_4)_3/\text{C}$  and (b)  $\text{Na}_{3.01}\text{V}_{1.99}\text{Cu}_{0.01}(\text{PO}_4)_3/\text{C}$  (circle signs (black) correspond to observed data; the solid line (red) is the calculated profile; tick marks (blue) represent the positions of allowed reflection; difference curve (green) on the same scale is plotted at the bottom of the pattern).

**Table S1.**

Structural parameters obtained from XRD Rietveld refinement of samples  $\text{Na}_{3.01}\text{V}_{1.99}\text{Co}_{0.01}(\text{PO}_4)_3/\text{C}$  and  $\text{Na}_{3.01}\text{V}_{1.99}\text{Cu}_{0.01}(\text{PO}_4)_3/\text{C}$  (space group  $R\bar{3}c$ ,  $Z = 6$ , occupancy of V/M sites was fixed in the refinement based on nominal chemical composition, bond distances are in Å,  $U_{iso}$  are Å<sup>2</sup>).

|               | $\text{Na}_{3.01}\text{V}_{1.99}\text{Co}_{0.01}(\text{PO}_4)_3$ | $\text{Na}_{3.01}\text{V}_{1.99}\text{Cu}_{0.01}(\text{PO}_4)_3$ |
|---------------|------------------------------------------------------------------|------------------------------------------------------------------|
| Na1 in 6b     |                                                                  |                                                                  |
| $x y z$       | 1/3 2/3 1/6                                                      | 1/3 2/3 1/6                                                      |
| $U_{iso}$     | 0.120(10)                                                        | 0.105(10)                                                        |
| occupancy     | 0.87(3)                                                          | 0.98(3)                                                          |
| Na2 in 18e    |                                                                  |                                                                  |
| $x y z$       | 2/3 0.9657(10) 1/12                                              | 2/3 0.9672(10) 1/12                                              |
| $U_{iso}$     | 0.050(5)                                                         | 0.054(5)                                                         |
| occupancy     | 0.696(10)                                                        | 0.667(9)                                                         |
| V/M in 12c    |                                                                  |                                                                  |
| $x y z$       | 1/3 2/3 0.01941(12)                                              | 1/3 2/3 0.01915(12)                                              |
| $U_{iso}$     | 0.0053(10)                                                       | 0.0082(10)                                                       |
| occupancy     | 0.99/0.01                                                        | 0.99/0.01                                                        |
| P in 18e      |                                                                  |                                                                  |
| $x y z$       | -0.0437(4) 1/3 1/12                                              | -0.0446(4) 1/3 1/12                                              |
| $U_{iso}$     | 0.0066(13)                                                       | 0.0132(13)                                                       |
| occupancy     | 1                                                                | 1                                                                |
| O1 in 36f     |                                                                  |                                                                  |
| $x y z$       | 0.1393(5) 0.5006(6) 0.0773(3)                                    | 0.1414(5) 0.4997(6) 0.0780(3)                                    |
| $U_{iso}$     | 0.0052(17)                                                       | 0.0082(16)                                                       |
| occupancy     | 1                                                                | 1                                                                |
| O2 in 36f     |                                                                  |                                                                  |
| $x y z$       | 0.5454(8) 0.8484(6) -0.0264(2)                                   | 0.5433(8) 0.8479(6) -0.0267(2)                                   |
| $U_{iso}$     | 0.022(2)                                                         | 0.020(2)                                                         |
| occupancy     | 1                                                                | 1                                                                |
| Bond distance |                                                                  |                                                                  |
| V–O           | 3 x 2.0007 3 x 2.0264                                            | 3 x 1.9887 3 x 2.0326                                            |
| P–O           | 1.4993 1.4994 2 x 1.5387                                         | 1.4944 1.4945 2 x 1.5472                                         |
| Na1–O         | 3 x 2.5117 3 x 2.5118                                            | 3 x 2.4951 3 x 2.4952                                            |
| Na2–O         | 2 x 2.3489 2 x 2.4753 2.6089<br>2.6090 2 x 2.8377 2 x 3.2559     | 2 x 2.3643 2 x 2.4601 2.6239<br>2.6240 2 x 2.8331 2 x 3.2287     |
| $R_p/R_{wp}$  | 7.69/10.17                                                       | 6.77/9.02                                                        |

**Table S2.**Crystal lattice parameters for  $\text{Na}_{3+x}\text{V}_{2-x}\text{M}^{\text{II}}_x(\text{PO}_4)_3/\text{C}$  ( $\text{M}^{\text{II}} = \text{Co}^{2+}, \text{Cu}^{2+}$ ;  $x = 0-0.05$ ).

| Samples                                                          | Lattice constant, Å |             |             |
|------------------------------------------------------------------|---------------------|-------------|-------------|
|                                                                  | <i>a</i>            | <i>c</i>    | <i>V</i>    |
| $\text{Na}_3\text{V}_2(\text{PO}_4)_3$                           | 8.7173(5)           | 21.7873(14) | 1433.83(14) |
| $\text{Na}_{3.01}\text{V}_{1.99}\text{Co}_{0.01}(\text{PO}_4)_3$ | 8.7276(3)           | 21.7992(7)  | 1437.99(8)  |
| $\text{Na}_{3.03}\text{V}_{1.97}\text{Co}_{0.03}(\text{PO}_4)_3$ | 8.7172(5)           | 21.7856(15) | 1433.69(15) |
| $\text{Na}_{3.05}\text{V}_{1.95}\text{Co}_{0.05}(\text{PO}_4)_3$ | 8.7209(2)           | 21.7928(7)  | 1435.36(7)  |
| $\text{Na}_{3.01}\text{V}_{1.99}\text{Cu}_{0.01}(\text{PO}_4)_3$ | 8.7167(3)           | 21.8218(9)  | 1435.89(10) |
| $\text{Na}_{3.03}\text{V}_{1.97}\text{Cu}_{0.03}(\text{PO}_4)_3$ | 8.7211(4)           | 21.7929(12) | 1435.44(12) |
| $\text{Na}_{3.05}\text{V}_{1.95}\text{Cu}_{0.05}(\text{PO}_4)_3$ | 8.7205(5)           | 21.7964(16) | 1435.47(16) |

Table S3.

Theoretical ratios of Na, V, M<sup>II</sup>, and P in M<sup>II</sup>-NVP for various doping mechanisms.

| <b>Chemical composition</b>                                                                                                                                    | <b>Molar ratio Na/V</b> |
|----------------------------------------------------------------------------------------------------------------------------------------------------------------|-------------------------|
| <b>Na<sub>3</sub>V<sub>2</sub>(PO<sub>4</sub>)<sub>3</sub> (pure)</b>                                                                                          | <b>1.5</b>              |
| <i>Doping of the VI site with the simultaneous addition of sodium for Na sites</i>                                                                             |                         |
| <b>Na<sub>3.01</sub>V<sub>1.99</sub>M<sup>II</sup><sub>0.01</sub>(PO<sub>4</sub>)<sub>3</sub></b>                                                              | <b>1.513</b>            |
| <b>Na<sub>3.03</sub>V<sub>1.97</sub>M<sup>II</sup><sub>0.03</sub>(PO<sub>4</sub>)<sub>3</sub></b>                                                              | <b>1.538</b>            |
| <b>Na<sub>3.05</sub>V<sub>1.95</sub>M<sup>II</sup><sub>0.05</sub>(PO<sub>4</sub>)<sub>3</sub></b>                                                              | <b>1.564</b>            |
| <i>Doping of the NaI site and the extraction of sodium from the Na sites</i>                                                                                   |                         |
| <b>Na<sub>2.98</sub>M<sup>II</sup><sub>0.01</sub>V<sub>2</sub>(PO<sub>4</sub>)<sub>3</sub></b>                                                                 | <b>1.49</b>             |
| <b>Na<sub>2.94</sub>M<sup>II</sup><sub>0.03</sub>V<sub>2</sub>(PO<sub>4</sub>)<sub>3</sub></b>                                                                 | <b>1.47</b>             |
| <b>Na<sub>2.9</sub>M<sup>II</sup><sub>0.05</sub>V<sub>2</sub>(PO<sub>4</sub>)<sub>3</sub></b>                                                                  | <b>1.45</b>             |
| <i>Doping of the VI site during the formation of heterovalent pair M<sup>2+</sup> + V<sup>4+</sup><br/>(provides for a partial valence change in vanadium)</i> |                         |
| <b>Na<sub>3</sub>V<sub>1.99</sub>M<sup>II</sup><sub>0.01</sub>(PO<sub>4</sub>)<sub>3</sub></b>                                                                 | <b>1.508</b>            |
| <b>Na<sub>3</sub>V<sub>1.97</sub>M<sup>II</sup><sub>0.03</sub>(PO<sub>4</sub>)<sub>3</sub></b>                                                                 | <b>1.523</b>            |
| <b>Na<sub>3</sub>V<sub>1.95</sub>M<sup>II</sup><sub>0.05</sub>(PO<sub>4</sub>)<sub>3</sub></b>                                                                 | <b>1.538</b>            |

Table S4.

ICP results for Co<sup>2+</sup> doped Na<sub>3</sub>V<sub>2</sub>(PO<sub>4</sub>)<sub>3</sub> samples.

| <b>Sample</b>     | <b>Found molar fraction for NVP</b> |          |           |          | <b>Molar ratio Na/V</b> |
|-------------------|-------------------------------------|----------|-----------|----------|-------------------------|
|                   | <b>Na</b>                           | <b>V</b> | <b>Co</b> | <b>P</b> |                         |
| <b>NVP (pure)</b> | 3.0301                              | 2.1061   | 0         | 3.0703   | <b>1.4387</b>           |
| <b>Co1-NVP</b>    | 3.0105                              | 1.9906   | 0.0098    | 3.1415   | <b>1.5124</b>           |
| <b>Co5-NVP</b>    | 3.0506                              | 1.9465   | 0.0493    | 3.0762   | <b>1.5672</b>           |

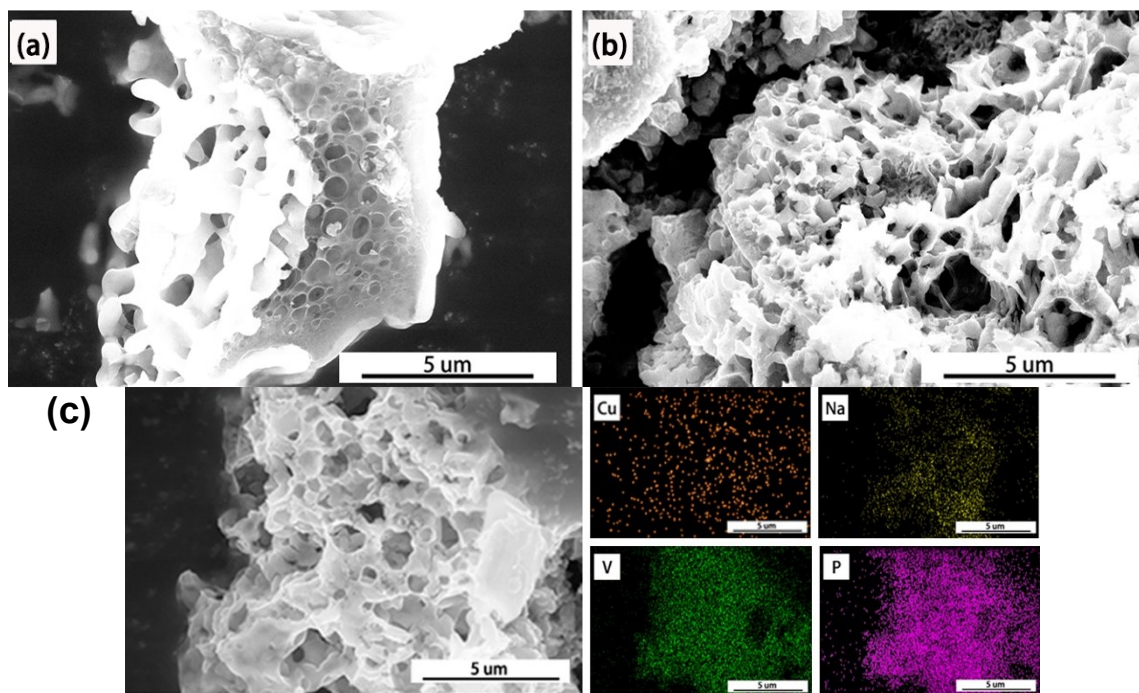

**Figure S2.** (a) SEM image of  $\text{Na}_{3.03}\text{V}_{1.97}\text{Co}_{0.03}(\text{PO}_4)_3/\text{C}$ ; (b) SEM image of  $\text{Na}_{3.05}\text{V}_{1.95}\text{Co}_{0.05}(\text{PO}_4)_3/\text{C}$ ; (c) SEM image and element mapping of  $\text{Na}_{3.01}\text{V}_{1.99}\text{Cu}_{0.01}(\text{PO}_4)_3/\text{C}$ .

**Table S5.**

The cycling performance of  $\text{Na}_{3+x}\text{V}_{2-x}\text{M}^{\text{II}}_x(\text{PO}_4)_3/\text{C}$  ( $\text{M}^{\text{II}} = \text{Co}, \text{Cu}$ ) compounds at 0.5C in a potential range of 2.5–4.0 V, mAh/g (capacity retention is indicated in %).

| Sample    | Number of cycles |             |
|-----------|------------------|-------------|
|           | 1                | 100         |
| NVP/C     | 93               | 88 (94.1%)  |
| Co1-NVP/C | 116              | 107 (92.2%) |
| Co3-NVP/C | 108              | 103 (95.3%) |
| Co5-NVP/C | 106              | 95 (88.9%)  |
| Cu1-NVP/C | 102              | 95 (93.4%)  |
| Cu3-NVP/C | 114              | 100 (87.7%) |
| Cu5-NVP/C | 101              | 89 (87.9%)  |

**Table S6.**

The cycling performance of  $\text{Na}_{3+x}\text{V}_{2-x}\text{M}^{\text{II}}_x(\text{PO}_4)_3/\text{C}$  ( $\text{M}^{\text{II}} = \text{Co}, \text{Cu}$ ) compounds at 10C in a potential range of 2.5–4.0 V, mAh/g (capacity retention is indicated in %).

| Sample    | Number of cycles |               |             |             |
|-----------|------------------|---------------|-------------|-------------|
|           | 1                | 100           | 500         | 1000        |
| NVP/C     | 756              | 74 (97.4 %)   | 73 (95.8 %) | 71 (93.3 %) |
| Co1-NVP/C | 106              | 101 (94.8 %)  | 95 (89.3 %) | 88 (83.2 %) |
| Co3-NVP/C | 97               | 95 (97.0 %)   | 86 (88.6 %) | 78 (80.3 %) |
| Co5-NVP/C | 85               | 79 (92.0 %)   | 71 (83.5 %) | 66 (77.4 %) |
| Cu1-NVP/C | 89               | 88 (98.1 %)   | 84 (93.7 %) | 83 (93.1 %) |
| Cu3-NVP/C | 92               | 86 (93.8 %)   | 78 (84.6 %) | 72 (78.8 %) |
| Cu5-NVP/C | 83               | 80.3 (96.9 %) | 74 (89.9 %) | 69 (82.6 %) |

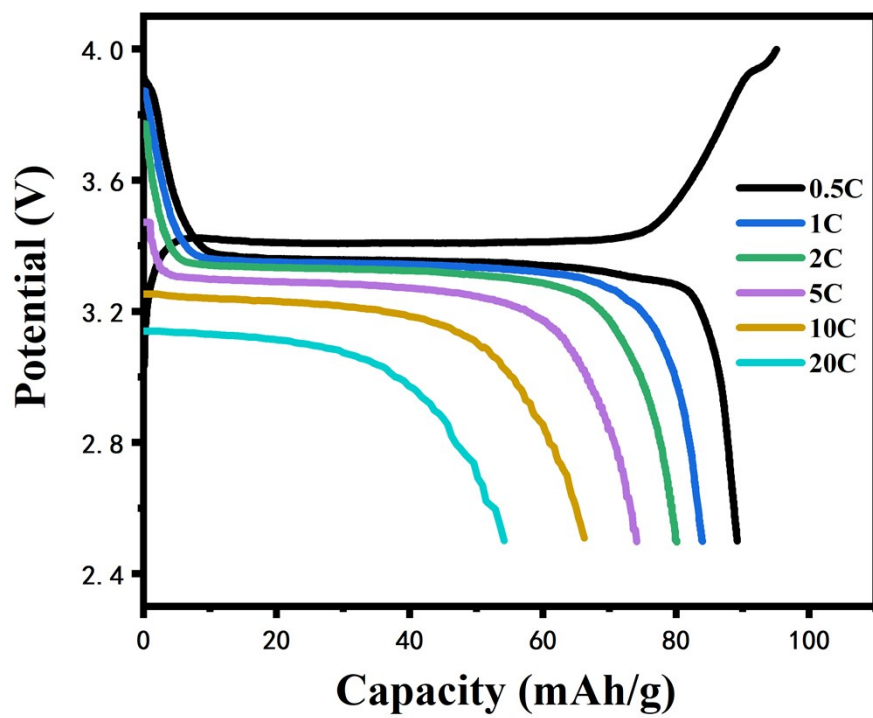

**Figure S3.** Charging-discharging profiles of NVP/C at different rates.



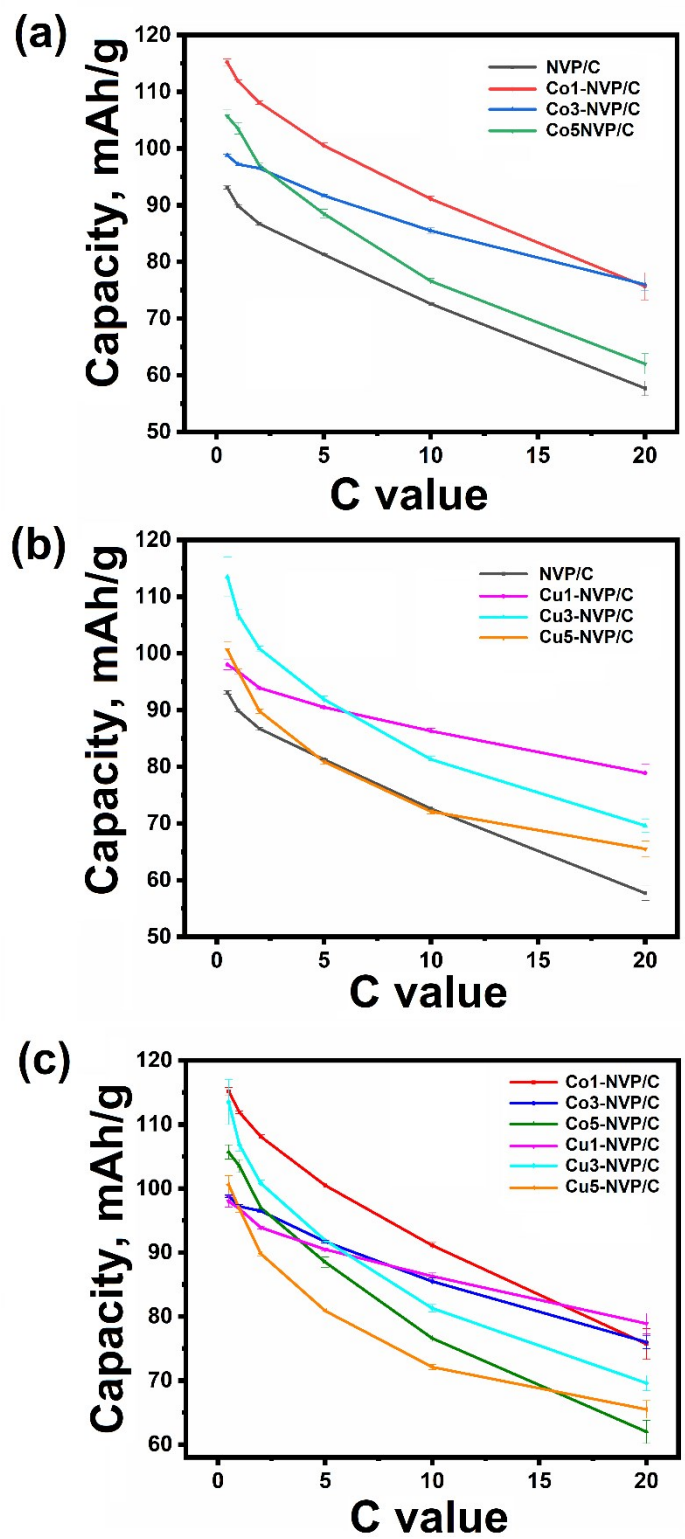

**Figure S4.** Changing the capacity of electrodes with different doping at different rates: (a) Co<sup>2+</sup>-doped and pure NVP (b) Cu<sup>2+</sup>-doped and pure NVP (c) comparison of Co<sup>2+</sup> and Cu<sup>2+</sup>-doped samples.

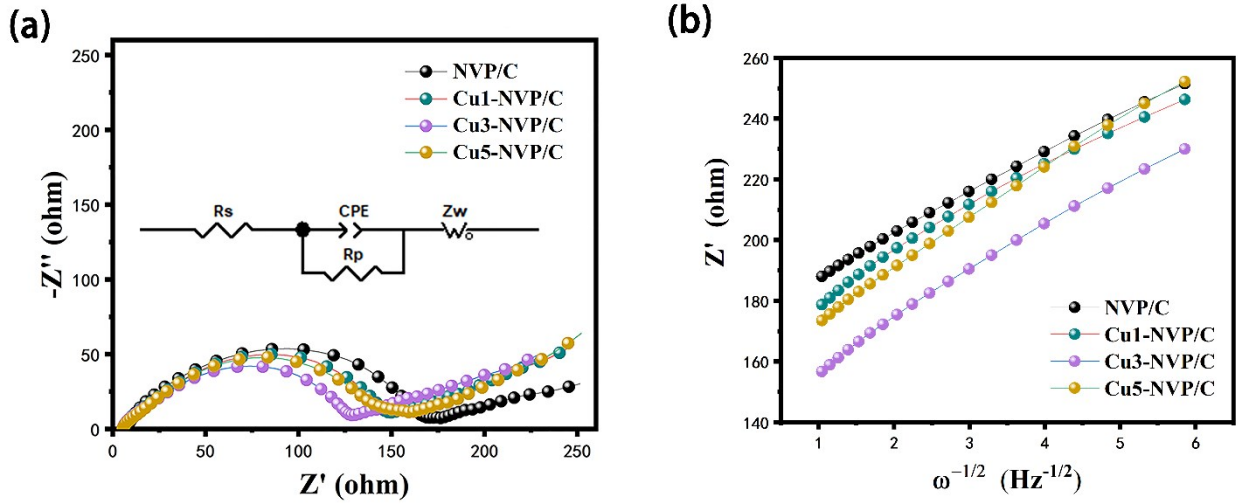

**Figure S5.** (a) Nyquist plots of  $\text{Na}_{3+x}\text{V}_{2-x}\text{Cu}_x(\text{PO}_4)_3/\text{C}$  ( $x=0-0.05$ ) after 100 cycles at 0.5 C (inset - the equivalent electrical circuit for the EIS); (b)  $Z'$  and  $\omega^{-1/2}$  relationship.

**Table S7.**

Kinetic parameters of  $\text{Na}_{3+x}\text{V}_{2-x}\text{M}^{\text{II}}_x(\text{PO}_4)_3/\text{C}$  ( $\text{M}^{\text{II}} = \text{Co}, \text{Cu}; x = 0-0.05$ ) obtained from equivalent circuit fitting.

| Sample    | $R_s/\Omega$ | $R_p/\Omega$ |
|-----------|--------------|--------------|
| NVP/C     | 7.104        | 150.03       |
| Co1-NVP/C | 6.942        | 85.12        |
| Co3-NVP/C | 5.6          | 92.3         |
| Co5-NVP/C | 5.243        | 101.6        |
| Cu1-NVP/C | 4.786        | 113          |
| Cu3-NVP/C | 4.72         | 110.3        |
| Cu5-NVP/C | 5.038        | 143.1        |

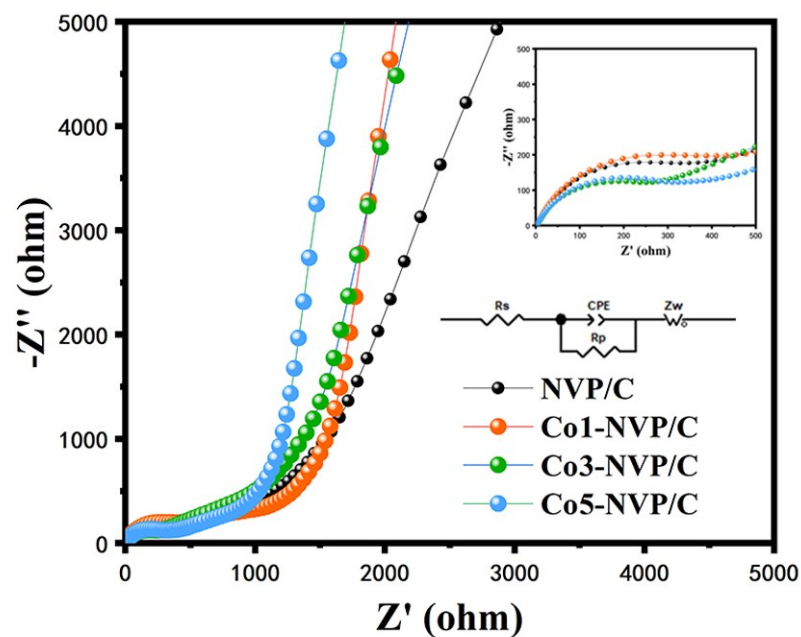

**Figure S6.** Nyquist plots of  $\text{Na}_{3+x}\text{V}_{2-x}\text{Co}_x(\text{PO}_4)_3/\text{C}$  ( $x = 0-0.05$ ) before testing, inset, the equivalent electrical circuit for the EIS.

**Table S8.**

Kinetic parameters of  $\text{Na}_{3+x}\text{V}_{2-x}\text{Co}_x(\text{PO}_4)_3/\text{C}$  before testing obtained from equivalent circuit fitting.

| Sample    | $R_s/\Omega$ | $R_p/\Omega$ |
|-----------|--------------|--------------|
| NVP/C     | 4.218        | 430.6        |
| Co1-NVP/C | 3.648        | 390.5        |
| Co3-NVP/C | 3.945        | 371.0        |
| Co5-NVP/C | 3.385        | 300.2        |

### ***Calculations of the diffusion coefficient ( $D_{Na^+}$ ) of sodium ions***

To estimate the diffusion coefficient of sodium ions ( $D_{Na^+}$ ), the low-frequency region of the EIS spectra is used. The diffusion kinetics can be determined according to the following equations:

$$D = \frac{R^2 T^2}{2A^2 n^4 F^4 C^2 \sigma^2} \quad (S1),$$

$$Z' = R_s + R_p + \sigma \omega^{-1/2} \quad (S2),$$

where  $R$  is the gas constant (8.314 J/molK),  $T$  stands for the absolute temperature (K),  $A$  is the contacting area of electrode with electrolyte (cm<sup>2</sup>),  $n$  is the number of transferred electrons,  $F$  is the Faraday constant (96500 C/mol),  $C$  is the concentration of Na ions in the cathode electrode (3.47 x 10<sup>-3</sup> mol/cm<sup>3</sup>), given the chemical composition of the active material,  $\sigma$  is the Warburg factor which can be calculated from  $Z'$ . The  $D_{Na^+}$  can be calculated from equation (S1),  $\sigma$  is related to  $Z'$  through equation (S2), and its value can be determined from the slope of the line between  $Z'$  and  $\omega^{-1/2}$ .

**Table S9.**

Sodium diffusion coefficients of  $\text{Na}_{3+x}\text{V}_{2-x}\text{M}^{\text{II}}_x(\text{PO}_4)_3/\text{C}$  ( $\text{M}^{\text{II}} = \text{Co}, \text{Cu}; x = 0-0.05$ ).

| <b>Sample</b>    | <b>D (cm<sup>2</sup>/s)</b> |
|------------------|-----------------------------|
| <b>NVP/C</b>     | $5.05 \times 10^{-11}$      |
| <b>Co1-NVP/C</b> | $1.06 \times 10^{-10}$      |
| <b>Co3-NVP/C</b> | $2.86 \times 10^{-11}$      |
| <b>Co5-NVP/C</b> | $6.34 \times 10^{-11}$      |
| <b>Cu1-NVP/C</b> | $4.49 \times 10^{-11}$      |
| <b>Cu3-NVP/C</b> | $3.81 \times 10^{-11}$      |
| <b>Cu5-NVP/C</b> | $3.28 \times 10^{-11}$      |

**Table S10.**

A comparison of the electrochemical performance of prepared Co- and Cu-doped NVP/C with the similar M<sup>2+</sup> or M<sup>3+</sup>-doped NVP electrodes.

| <b>Composition</b>                                                                      | <b>Specific Capacity<br/>(mAh/g)</b> | <b>Cycle<br/>Number</b> | <b>C-<br/>rate</b> | <b>Capacity<br/>Retention (%)</b> | <b>Ref.</b>          |
|-----------------------------------------------------------------------------------------|--------------------------------------|-------------------------|--------------------|-----------------------------------|----------------------|
| <i>Co<sup>2+</sup>-doped NVP</i>                                                        |                                      |                         |                    |                                   |                      |
| <b>Na<sub>3.01</sub>V<sub>1.99</sub>Co<sub>0.01</sub>(PO<sub>4</sub>)<sub>3</sub></b>   | <b>116</b>                           | <b>100</b>              | <b>0.5C</b>        | <b>92.2</b>                       | <b>This<br/>work</b> |
|                                                                                         | <b>106</b>                           | <b>1000</b>             | <b>10C</b>         | <b>83.3</b>                       |                      |
| <b>Na<sub>3.03</sub>V<sub>1.97</sub>Co<sub>0.03</sub>(PO<sub>4</sub>)<sub>3</sub></b>   | <b>108</b>                           | <b>100</b>              | <b>0.5C</b>        | <b>95.3</b>                       | <b>This<br/>work</b> |
|                                                                                         | <b>97</b>                            | <b>1000</b>             | <b>10C</b>         | <b>80.3</b>                       |                      |
| <b>Na<sub>3.05</sub>V<sub>1.95</sub>Co<sub>0.05</sub>(PO<sub>4</sub>)<sub>3</sub></b>   | <b>106</b>                           | <b>100</b>              | <b>0.5C</b>        | <b>88.9</b>                       | <b>This<br/>work</b> |
|                                                                                         | <b>85</b>                            | <b>1000</b>             | <b>10C</b>         | <b>77.4</b>                       |                      |
| Na <sub>3.1</sub> V <sub>1.9</sub> Co <sub>0.1</sub> (PO <sub>4</sub> ) <sub>3</sub>    | 111                                  | 100                     | 1C                 | 99                                | [49]                 |
| Na <sub>3.5</sub> V <sub>1.5</sub> Co <sub>0.5</sub> (PO <sub>4</sub> ) <sub>3</sub>    | 83                                   | 100                     | 1C                 | 97                                | [49]                 |
| <i>Cu<sup>2+</sup>-doped NVP</i>                                                        |                                      |                         |                    |                                   |                      |
| <b>Na<sub>3.01</sub>V<sub>1.99</sub>Cu<sub>0.01</sub>(PO<sub>4</sub>)<sub>3</sub></b>   | <b>102</b>                           | <b>100</b>              | <b>0.5C</b>        | <b>93.4</b>                       | <b>This<br/>work</b> |
|                                                                                         | <b>89</b>                            | <b>1000</b>             | <b>10</b>          | <b>83.2</b>                       |                      |
| <b>Na<sub>3.03</sub>V<sub>1.97</sub>Cu<sub>0.03</sub>(PO<sub>4</sub>)<sub>3</sub></b>   | <b>114</b>                           | <b>100</b>              | <b>0.5C</b>        | <b>87.7</b>                       | <b>This<br/>work</b> |
|                                                                                         | <b>92</b>                            | <b>1000</b>             | <b>10C</b>         | <b>78.8</b>                       |                      |
| <b>Na<sub>3.05</sub>V<sub>1.95</sub>Cu<sub>0.05</sub>(PO<sub>4</sub>)<sub>3</sub></b>   | <b>101</b>                           | <b>100</b>              | <b>0.5C</b>        | <b>87.9</b>                       | <b>This<br/>work</b> |
|                                                                                         | <b>83</b>                            | <b>1000</b>             | <b>10C</b>         | <b>82.6</b>                       |                      |
| <i>Ni<sup>2+</sup>-doped NVP</i>                                                        |                                      |                         |                    |                                   |                      |
| Na <sub>3.03</sub> V <sub>1.97</sub> Ni <sub>0.03</sub> (PO <sub>4</sub> ) <sub>3</sub> | 113.4                                | 100                     | 0.5C               | 90.5                              | [40]                 |
|                                                                                         | 107.1                                | 100                     | 1C                 | 95.5                              |                      |
| Na <sub>3</sub> V <sub>1.97</sub> Ni <sub>0.03</sub> (PO <sub>4</sub> ) <sub>3</sub>    | 98.1                                 | 50                      | 5C                 | 93.5                              | [52]                 |
| Na <sub>3.1</sub> V <sub>1.9</sub> Ni <sub>0.1</sub> (PO <sub>4</sub> ) <sub>3</sub>    | 109                                  | 100                     | 1C                 | 94.7                              | [49]                 |
| <i>Mn<sup>2+</sup>-doped NVP</i>                                                        |                                      |                         |                    |                                   |                      |
| Na <sub>3</sub> V <sub>1.875</sub> Mn <sub>0.025</sub> (PO <sub>4</sub> ) <sub>3</sub>  | 89.2                                 | 100                     | 10C                | 97.2                              | [38]                 |
|                                                                                         | 86.7                                 | 100                     | 15C                | 91.6                              |                      |
| Na <sub>3</sub> V <sub>1.9</sub> Mn <sub>0.1</sub> (PO <sub>4</sub> ) <sub>3</sub>      | 78                                   | 50                      | 10C                | 90                                | [69]                 |
| Na <sub>3</sub> V <sub>1.8</sub> Mn <sub>0.2</sub> (PO <sub>4</sub> ) <sub>3</sub>      | 77.8                                 | 10.000                  | 30C                | 82                                | [70]                 |
| Na <sub>3</sub> V <sub>1.7</sub> Mn <sub>0.3</sub> (PO <sub>4</sub> ) <sub>3</sub>      | 104                                  | 20                      | 0.5C               | -                                 | [39]                 |
|                                                                                         | 92                                   | 20                      | 2C                 | -                                 |                      |
| <i>Mg<sup>2+</sup>-doped NVP</i>                                                        |                                      |                         |                    |                                   |                      |
| Na <sub>3</sub> V <sub>1.95</sub> Mg <sub>0.05</sub> (PO <sub>4</sub> ) <sub>3</sub>    | 86.2                                 | 50                      | 20C                | 81                                | [36]                 |
|                                                                                         | 102                                  | 108                     | 1C                 | 90.2                              |                      |
| Na <sub>3</sub> V <sub>1.95</sub> Mg <sub>0.05</sub> (PO <sub>4</sub> ) <sub>3</sub>    | 96.7                                 | 180                     | 10C                | 88.9                              | [37]                 |
| Na <sub>3</sub> V <sub>1.93</sub> Mg <sub>0.07</sub> (PO <sub>4</sub> ) <sub>3</sub>    | 95                                   | 1000                    | 10C                | 84.6                              | [51]                 |
| Na <sub>3.1</sub> V <sub>1.9</sub> Mg <sub>0.1</sub> (PO <sub>4</sub> ) <sub>3</sub>    | 113                                  | 100                     | 1C                 | 94                                | [49]                 |
| Na <sub>3.5</sub> V <sub>1.5</sub> Mg <sub>0.5</sub> (PO <sub>4</sub> ) <sub>3</sub>    | 100                                  | 100                     | 1C                 | 97                                | [49]                 |
| <i>Al<sup>3+</sup>-doped NVP</i>                                                        |                                      |                         |                    |                                   |                      |
| Na <sub>3</sub> V <sub>1.98</sub> Al <sub>0.02</sub> (PO <sub>4</sub> ) <sub>3</sub>    | 95.8                                 | 50                      | 0.6C               | 99.2                              | [42]                 |
| Na <sub>3</sub> V <sub>1.8</sub> Al <sub>0.2</sub> (PO <sub>4</sub> ) <sub>3</sub>      | 117.1                                | 100                     | 1C                 | 95                                | [72]                 |
| <i>Cr<sup>3+</sup>-doped NVP</i>                                                        |                                      |                         |                    |                                   |                      |
| Na <sub>3</sub> V <sub>1.92</sub> Cr <sub>0.08</sub> (PO <sub>4</sub> ) <sub>3</sub>    | 112.2                                | 50                      | 0.1C               | 97.2                              | [45]                 |
| Na <sub>3</sub> V <sub>1.9</sub> Cr <sub>0.1</sub> (PO <sub>4</sub> ) <sub>3</sub>      | 107                                  | 40                      | 2C                 | 99                                | [18]                 |
| <i>La<sup>3+</sup>-doped NVP</i>                                                        |                                      |                         |                    |                                   |                      |
| Na <sub>3</sub> V <sub>1.99</sub> La <sub>0.01</sub> (PO <sub>4</sub> ) <sub>3</sub>    | 108.1                                | 100                     | 0.2C               | 97                                | [46]                 |
